# Supplementary material for: SUFU haploinsufficiency causes a recognisable neurodevelopmental phenotype at the mild end of the Joubert syndrome spectrum
Source: PubMed Central journal article supplement — J Med Genet. 2021 Oct 21;59(9):888–94. doi: 10.1136/jmedgenet-2021-108114 (PMC9411896; doi:10.1136/jmedgenet-2021-108114), 2021-10-21
Supplement: jmedgenet-2021-108114supp001.pdf [file jmedgenet-2021-108114supp001.pdf]

## Supplementary Material

### Haploinsufficiency of the *SUFU* gene cause a recognizable neurodevelopmental phenotype at the mild end of Joubert syndrome spectrum

Valentina Serpieri,<sup>1,2</sup> Fulvio D'Abrusco,<sup>1</sup> Jennifer C. Dempsey,<sup>3</sup> Yong-Han Hank Cheng,<sup>3</sup> Filippo Arrigoni,<sup>4</sup> Janice Baker,<sup>5</sup> Roberta Battini,<sup>6,7</sup> Enrico Bertini,<sup>8</sup> Renato Borgatti,<sup>9,10</sup> Angela K. Christman,<sup>3</sup> Cynthia Curry,<sup>11,12,13</sup> Stefano D'Arrigo,<sup>14</sup> Joel Fluss,<sup>15</sup> Michael Freilinger,<sup>16</sup> Simone Gana,<sup>2</sup> Gisele Elias Ishak,<sup>17</sup> Vincenzo Leuzzi,<sup>18</sup> Hailey Loucks,<sup>3</sup> Filippo Manti,<sup>18</sup> Nancy Mendelsohn,<sup>19</sup> Laura Merlini,<sup>20</sup> Caitlin V. Miller,<sup>3</sup> Ansar Muhammad,<sup>21,22</sup> Sara Nuovo,<sup>23</sup> Romina Romaniello,<sup>24</sup> Wolfgang M. Schmidt,<sup>25</sup> Sabrina Signorini,<sup>10</sup> Sabrina Siliquini,<sup>26</sup> Krzysztof Szczaluba,<sup>27</sup> Gessica Vasco,<sup>28</sup> Meredith Wilson,<sup>29,30</sup> Ginevra Zanni,<sup>8</sup> University of Washington Center for Mendelian Genomics,<sup>31</sup> Eugen Boltshauser,<sup>32</sup> Dan Doherty,<sup>3,33</sup> Enza Maria Valente<sup>1,2</sup>

Supplementary Table 1 - Clinical features (European cohort)

| Family code                         | COR 206       | COR 269  |         | COR 280   |          |          |          | COR 552   |         | COR 572    |          | CCM 667    | OPBG-136     | Vienna family |       | COR537    |                 | COR599     |                        |
|-------------------------------------|---------------|----------|---------|-----------|----------|----------|----------|-----------|---------|------------|----------|------------|--------------|---------------|-------|-----------|-----------------|------------|------------------------|
| cDNA c.                             | 1194_119 5del | 895C>T   |         | 846dup    |          |          |          | 1022+1G>A |         | 846dup     |          | 71dup      | 757G>T       | 71del         |       | 37_53del  |                 | 1145del    |                        |
| protein p.                          | S399Yfs*4     | R299*    |         | E283Rfs*3 |          |          |          | splice    |         | E283Rfs*3  |          | A25G fs*23 | E253*        | P24Rfs*72     |       | T13Wfs*29 |                 | P382L fs*4 |                        |
| segregation                         | de novo       | maternal |         | maternal  |          |          |          | maternal  |         | not tested |          | de novo    | de novo      | maternal      |       | paternal  |                 | de novo    |                        |
| Subjects                            | NG 2282       | NG 2526  | NG 2527 | NG 2721   | NG 2724  | 15045    | 15043    | NG 2723   | NG 5499 | NG 5748    | NG 5723  | NG 5866    | NG 5993      | OPBG-136      | B3515 | B6284     | NG 5426         | NG 6227    | NG 6191                |
| Relation with proband               | prob          | prob     | moth    | prob      | sib      | sib      | sib      | moth      | prob    | moth       | prob     | sib        | prob         | prob          | prob  | moth      | prob            | fath       | prob                   |
| Age                                 | 10-15y        | 10-15y   | 40-45y  | 15-20y    | 10-15y   | 10-15y   | 5-10y    | 40-45y    | 5-10y   | 30-35y     | 5-10y    | 5-10y      | 0-5y         | 5-10y         | 5-10y | 40-45y    | 5-10y           | 50-55y     | 0-5y                   |
| Sex                                 | M             | M        | F       | M         | F        | M        | M        | F         | M       | F          | M        | M          | M            | F             | M     | F         | F               | M          | M                      |
| Referral diagnosis for genetic test | poss. JS      | JS       | NA      | poss. JS  | poss. JS | poss. JS | poss. JS | NA        | JS      | NA         | poss. JS | poss. JS   | poss. JS MaC | COMA          | COMA  | NA        | JS              | NA         | JS                     |
| infantile hypotonia                 | no            | yes      | no      | no        | no       | no       | no       | no        | yes     | no         | yes      | yes        | yes          | yes           | yes   | no        | yes             | no         | yes                    |
| abnormal breathing                  | yes           | no       | no      | no        | no       | no       | no       | no        | yes     | no         | no       | no         | no           | no            | no    | no        | no              | no         | no                     |
| sitting                             | 9m            | 9m       | 8m      | 7m        | 6m       | 7m       | 6m       | norm      | 24m     | 8m         | 9m       | 7m         | 8m           | 8m            | 12m   | norm      | 8m              | 6m         | 8m                     |
| independent walking                 | 21m           | 30m      | 18m     | 19m       | 18m      | 18m      | 18m      | norm      | 6y      | 18m        | 36m      | 24m        | 22m          | 24m           | 24m   | norm      | 14m             | 14m        | no                     |
| speech delay                        | no            | no       | no      | no        | yes      | no       | no       | no        | yes     | no         | yes      | yes        | yes          | yes           | yes   | no        | yes             | no         | -                      |
| persistent COMA                     | yes           | yes      | no      | yes       | yes      | yes      | yes      | no        | yes     | no         | yes      | yes        | yes          | yes           | yes   | no        | yes             | no         | yes                    |
| mild ataxia                         | no            | yes      | yes     | no        | no       | no       | no       | no        | yes     | no         | yes      | yes        | yes          | yes           | yes   | no        | no              | no         | -                      |
| macrocephaly *                      | yes           | no       | no      | yes       | yes      | yes      | yes      | no        | yes     | no         | no       | no         | yes          | yes           | yes   | no        | frontal bossing | no         | yes                    |
| ID                                  | no            | no       | no      | no        | no       | no       | no       | no        | mod     | no         | sev      | sev        | mild         | mild          | mild  | no        | no              | no         | -                      |
| Education                           | MS            | MS       | MS      | MS        | MS       | MS       | MS       | MS        | SAS     | MS         | SAS      | SAS        | -            | MS            | SAS   | MS        | SAS             | MS         | -                      |
| Other features                      | no            | no       | no      | no        | no       | no       | no       | no        | no      | no         | no       | no         | no           | no            | no    | no        | no              | no         | bicuspid valve insuff. |

**Legend:** COMA, congenital ocular-motor apraxia; fath, father; ID, intellectual disability, JS, Joubert syndrome; m, months; MaC, macrocerebellum; mod, moderate; moth, mother; MTS, molar tooth sign; NA, not applicable; norm: exact age could not be remembered but reported as normal; poss. JS: possible JS (reported by referring clinicians/neuroradiologists with variable terminology [JS-like, mild JS, mild MTS, JS spectrum], as they featured some clinical and/or imaging features suggestive of JS but not sufficient to reach a definite diagnosis); prob, proband; sev, severe; y, years. \*includes parental report of "large head", even if not proven >98

percentile. For education: MS, mainstream school; SAS, school attendance with support. Clinically asymptomatic carrier parents are shaded in blue. Raw data available at 10.5281/zenodo.5502747.

**Supplementary Table 2 - Clinical features (US cohort)**

| Family                              | UW-422         | UW423-UW427   |         |                                 |                   | UW435                                                     | UW463          | UW430     |         | UW464          | UW465          |
|-------------------------------------|----------------|---------------|---------|---------------------------------|-------------------|-----------------------------------------------------------|----------------|-----------|---------|----------------|----------------|
| cDNA c.                             | 1294C>T        | 304del        |         |                                 |                   | 1258G>T                                                   | 1158-1G>A      | 1157+3G>A |         | 1023-2A>C      | 23_29del       |
| protein p.                          | Q432*          | N102Tfs*19    |         |                                 |                   | E420*                                                     | splice         | splice    |         | splice         | G8Afs*86       |
| segregation                         | <i>de novo</i> | both paternal |         |                                 |                   | not tested                                                | <i>de novo</i> | paternal  |         | <i>de novo</i> | <i>de novo</i> |
| Subjects                            | UW422-3        | UW423-3       | UW423-1 | UW427-3                         | UW427-1           | UW435-3                                                   | UW463-3        | UW430-3   | UW430-1 | UW464-3        | UW465-3        |
| Relation with proband               | prob           | prob          | fath    | cousin (son of UW427-1)         | cousin of UW423-1 | prob                                                      | prob           | prob      | fath    | prob           | prob           |
| Age                                 | 10-15y         | 5-10y         | 35-40y  | 5-10y                           | 40-45y            | 5-10y                                                     | 5-10y          | 5-10y     | 35-40y  | 20-25m         | 5-10y          |
| Sex                                 | M              | M             | M       | M                               | M                 | M                                                         | M              | M         | M       | M              | M              |
| Referral diagnosis for genetic test | poss. JS       | COMA          | -       | COMA                            | -                 | COMA                                                      | poss. JS       | COMA      | -       | poss. JS       | poss. JS       |
| infantile hypotonia                 | yes            | yes           | no      | yes                             | no                | yes                                                       | yes            | yes       | no      | yes            | yes            |
| abnormal breathing                  | no             | yes           | no      | no                              | no                | yes                                                       | no             | no        | no      | no             | no             |
| sitting                             | 9m             | 12m           | 9-11m   | 9m                              | -                 | 9m                                                        | 18m            | 14m       | 7m      | 8m             | 6m             |
| independent walking                 | 20m            | 30m           | 12-15m  | 22m                             | -                 | 21m                                                       | 36m            | 30m       | 12m     | no             | 14m            |
| speech delay                        | no             | no            | no      | no                              | no                | no                                                        | no             | no        | no      | -              | yes            |
| persistent COMA                     | yes            | yes           | no      | yes                             | no                | yes                                                       | yes            | yes       | no      | yes            | yes            |
| mild ataxia                         | no             | yes           | no      | yes                             | no                | yes                                                       | yes            | yes       | no      | no             | yes            |
| macrocephaly *                      | yes            | yes           | yes     | yes                             | -                 | yes                                                       | yes            | yes       | yes     | yes            | yes            |
| ID                                  | no             | no            | no      | no                              | no                | no                                                        | no             | mild      | no      | -              | no             |
| Education                           | MS             | SAS           | MS      | MS                              | MS                | MS                                                        | SAS            | SAS       | MS      | -              | SAS            |
| Other features                      |                |               |         | postaxial polydactyly left foot |                   | Type I laryngeal cleft, aplasia cutis, café au lait spots |                |           |         |                |                |

**Legend:** COMA, congenital ocular-motor apraxia; fath, father; ID, intellectual disability, JS, Joubert syndrome; m, months; MTS, molar tooth sign; poss. JS: possible JS (reported by referring clinicians/neuroradiologists with variable terminology [JS-like, mild JS, mild MTS, JS spectrum], as they featured some clinical and/or imaging features suggestive of JS but not sufficient to reach a definite diagnosis); prob, proband, y, years. \*includes parental report of "larger head than average", even if not proven >98 percentile. For education: MS, mainstream school; SAS, school attendance with support. Clinically asymptomatic carrier parents are shaded in blue. Raw data available at 10.5281/zenodo.5502747.

**Supplementary Table 3 - Brain MRI features (European cohort)**

| Family                        | COR 206    | COR 269    |            | COR 280    |            |       |       |         | COR 552    |            | COR 572    |            | CCM 667    | OPBG-136     | Vienna family |       | COR537 COR537 |            | COR5 99    |
|-------------------------------|------------|------------|------------|------------|------------|-------|-------|---------|------------|------------|------------|------------|------------|--------------|---------------|-------|---------------|------------|------------|
| <b>Subjects</b>               | NG<br>2282 | NG<br>2526 | NG<br>2527 | NG<br>2721 | NG<br>2724 | 15045 | 15043 | NG 2723 | NG<br>5499 | NG<br>5748 | NG<br>5723 | NG<br>5866 | NG<br>5993 | OPBG-<br>136 | B3515         | B6284 | NG<br>5426    | NG<br>6227 | NG<br>6191 |
| <b>Relation with proband</b>  | prob       | prob       | moth       | prob       | sib        | sib   | sib   | moth    | prob       | moth       | prob       | sib        | prob       | prob         | prob          | moth  | prob          | fath       | prob       |
| SCP horizontal                | yes        | yes        | yes        | yes        | yes        | yes   | yes   | yes     | yes        | -          | yes        | yes        | yes        | yes          | yes           | -     | yes           | no         | yes        |
| SCP long                      | yes        | ?          | yes        | yes        | yes        | yes   | yes   | yes     | yes        | -          | yes        | yes        | yes        | ?            | yes           | -     | yes           | no         | yes        |
| SCP thick                     | yes        | yes        | yes        | yes        | yes        | yes   | yes   | yes     | yes        | -          | yes        | yes        | yes        | yes          | yes           | -     | yes           | no         | yes        |
| Superior cerebellar dysplasia | yes        | yes        | yes        | yes        | yes        | yes   | yes   | yes     | yes        | -          | yes        | yes        | yes        | yes          | yes           | -     | yes           | no         | yes        |
| Vermis hypoplasia             | yes        | yes        | yes        | yes        | yes        | yes   | yes   | yes     | yes        | -          | yes        | yes        | yes        | yes          | yes           | -     | yes           | no         | yes        |
| Vermian split                 | yes        | yes        | no         | no         | yes        | yes   | yes   | no      | no         | -          | yes        | ?          | ?          | ?            | no            | -     | yes           | no         | yes        |
| Fastigium displaced           | yes        | yes        | no         | yes        | yes        | no    | no    | no      | no         | -          | no         | no         | no         | no           | no            | -     | yes           | no         | yes        |

**Legend:** SCP, superior cerebellar peduncles; ?, unable to assess due to image quality. Clinically asymptomatic carrier parents are shaded in blue.

**Supplementary Table 4 - Brain MRI features (US cohort)**

| Family                        | UW-422  | UW423-UW427 |         |                         |                   | UW435   | UW463   | UW430   |         | UW464   | UW465   |
|-------------------------------|---------|-------------|---------|-------------------------|-------------------|---------|---------|---------|---------|---------|---------|
| <b>Subjects</b>               | UW422-3 | UW423-3     | UW423-1 | UW427-3                 | UW427-1           | UW435-3 | UW463-3 | UW430-3 | UW430-1 | UW464-3 | UW465-3 |
| <b>Relation with proband</b>  | prob    | prob        | father  | cousin (son of UW427-1) | cousin of UW423-1 | prob    | prob    | prob    | father  | prob    | prob    |
| SCP horizontal                | yes     | yes         | -       | ?                       | -                 | no      | yes     | yes     | -       | yes     | yes     |
| SCP long                      | no      | yes         | -       | yes                     | -                 | no      | yes     | yes     | -       | yes     | yes     |
| SCP thick                     | no      | yes         | -       | yes                     | -                 | no      | yes     | yes     | -       | no      | yes     |
| Superior cerebellar dysplasia | yes     | yes         | -       | yes                     | -                 | yes     | yes     | yes     | -       | yes     | yes     |
| Vermis hypoplasia             | yes     | yes         | -       | yes                     | -                 | yes     | yes     | yes     | -       | yes     | yes     |
| Vermian split                 | yes     | yes         | -       | ?                       | -                 | yes     | yes     | yes     | -       | yes     | yes     |
| Fastigium displaced           | yes     | yes         | -       | yes                     | -                 | no      | yes     | yes     | -       | yes     | yes     |

**Legend:** SCP, superior cerebellar peduncles; ?, unable to assess due to image quality. Clinically asymptomatic carrier parents are shaded in blue.
